# Supplementary material
Source: PubMed Central journal article supplement (PMC4202304)
Supplement: supp_jiu137_jiu137supp.pdf [file supp_jiu137_jiu137supp.pdf]

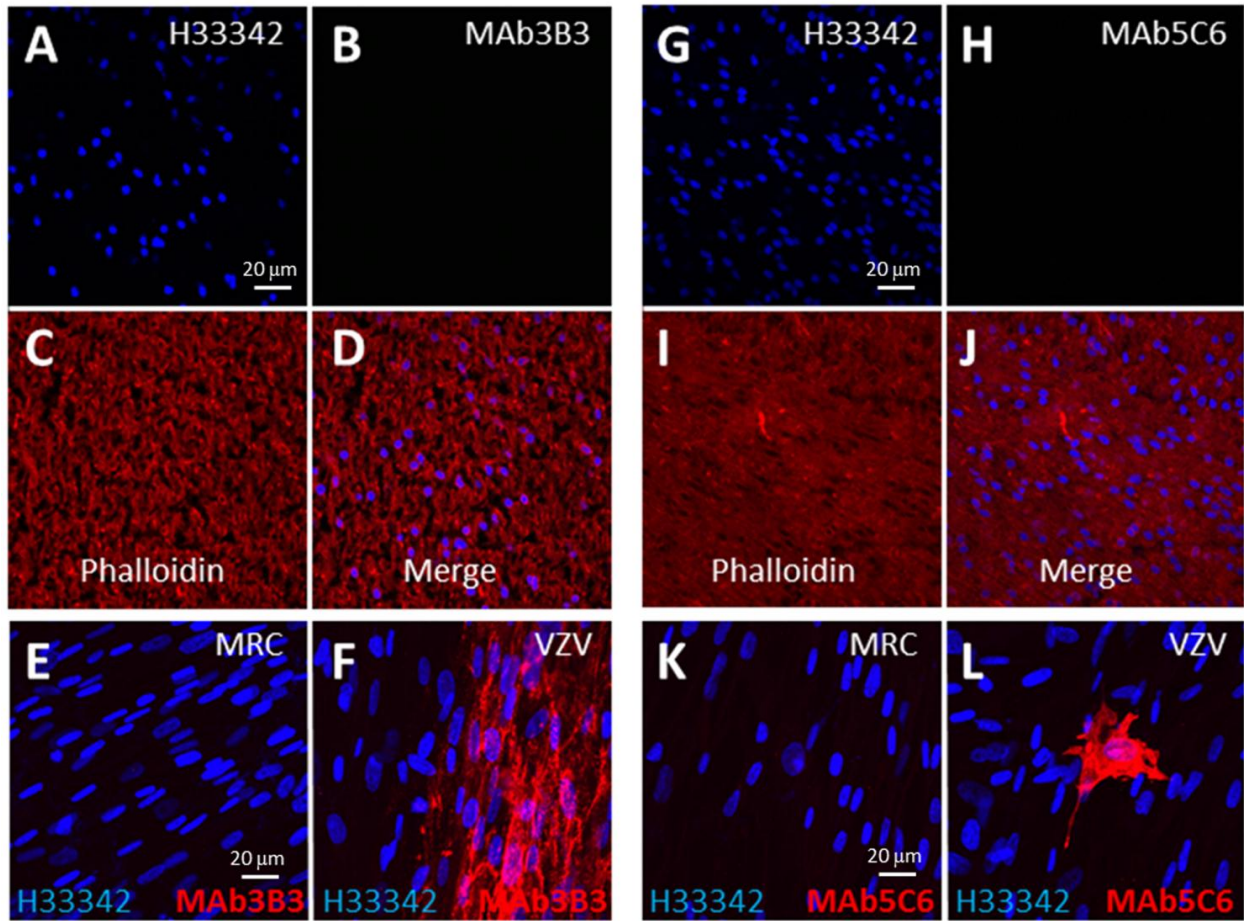

Supplementary Figure S1. Control immunostaining experiments. Brain tissue is included in panels A-D and G-J. The brain tissue was first treated with Hoechst 33342 fluorescent stain to identify nuclei. Then panels were incubated with either MAb3B3 (panel B) or MAb5C6 (panel H); secondary antibody was goat anti-mouse Alexa Fluor. The brain tissue was also treated with Alexa Fluor 555 phalloidin to stain actin (panels C and I). Panels D and J represent the merge of panels A-C and G-I respectively. MRC stained fibroblast cells are included in panels E, F, K and L. Panel E is uninfected and panel F is VZV-infected (96 hpi); both were incubated with MAb3B3. Panel K is uninfected and panel L is VZV-infected (96 hpi); both were incubated with MAb5C6. Note: all uninfected panels were negative after immunostaining with anti-VZV MAb (panels B, H, E and K). Scale bars are included.
